# Supplementary material
Source: Research Square preprint supplement (doi:10.21203/rs.3.rs-9736988/v1)
Supplement: Supplementary file 1 [file 1c4bd7f426441c58c1e7d0ed.docx]

**Supplementary Table 1**

Sensitivity analysis: multivariable logistic regression with age categorized (≥65 vs <65 years)

| **Covariates** | **OR** | **95% CI** | **P value** |
| --- | --- | --- | --- |
| Age, ≥65 years (vs <65 years) | 0.597 | 0.315–1.130 | 0.113 |
| Sex, male | 1.280 | 0.567–2.880 | 0.554 |
| Preoperative BMI | 1.070 | 0.966–1.180 | 0.200 |
| Preoperative CRP | 0.559 | 0.279–1.120 | 0.099 |
| Procedure, esophagectomy | 0.560 | 0.279–1.130 | 0.104 |
| Clavien-Dindo (≥ III) | 0.454 | 0.162–1.270 | 0.132 |

Odds ratios for continuous variables represent the effect per one-unit increase.

**Supplementary Table 2**

Sensitivity analysis: multivariable logistic regression additionally adjusted for pathological stage

| **Covariates** | **OR** | **95% CI** | **P value** |
| --- | --- | --- | --- |
| Age (per 1-year increase) | 0.949 | 0.912–0.987 | 0.009 |
| Sex, male | 1.520 | 0.658–3.530 | 0.325 |
| Preoperative BMI | 1.070 | 0.966–1.180 | 0.199 |
| Preoperative CRP | 0.548 | 0.277–1.080 | 0.084 |
| Procedure, esophagectomy | 0.619 | 0.303–1.260 | 0.187 |
| Clavien-Dindo (≥ III) | 0.456 | 0.161–1.300 | 0.140 |
| Pathological stage (III-IV vs I-II) | 0.890 | 0.449–1.760 | 0.738 |

Odds ratios for continuous variables represent the effect per one-unit increase.

**Supplementary Table 3**

Sensitivity analysis: multivariable logistic regression additionally adjusted for time from surgery to questionnaire

| **Covariates** | **OR** | **95% CI** | **P value** |
| --- | --- | --- | --- |
| Age (per 1-year increase) | 0.947 | 0.910–0.986 | 0.008 |
| Sex, male | 1.610 | 0.687–3.750 | 0.274 |
| Preoperative BMI | 1.070 | 0.965–1.190 | 0.199 |
| Preoperative CRP | 0.536 | 0.267–1.070 | 0.079 |
| Procedure, esophagectomy | 0.553 | 0.263–1.160 | 0.119 |
| Clavien-Dindo (≥ III) | 0.459 | 0.162–1.300 | 0.143 |
| Time from surgery to questionnaire | 1.000 | 0.999–1.000 | 0.427 |

Odds ratios for continuous variables represent the effect per one-unit increase.

**Supplementary Table 4**

Sensitivity analysis: multivariable logistic regression additionally adjusted for comorbidity burden (Charlson Comorbidity Index)

| **Covariates** | **OR** | **95% CI** | **P value** |
| --- | --- | --- | --- |
| Age (per 1-year increase) | 0.948 | 0.911–0.986 | 0.008 |
| Sex, male | 1.580 | 0.678–3.690 | 0.289 |
| Preoperative BMI | 1.070 | 0.967–1.180 | 0.187 |
| Preoperative CRP | 0.545 | 0.278–1.070 | 0.076 |
| Procedure, esophagectomy | 0.592 | 0.291–1.200 | 0.147 |
| Clavien-Dindo (≥ III) | 0.460 | 0.161–1.320 | 0.148 |
| Charlson Comorbidity Index | 1.250 | 0.627–2.480 | 0.530 |

Odds ratios for continuous variables represent the effect per one-unit increase.

**Supplementary Table 5**

Sensitivity analysis: multivariable logistic regression additionally adjusted for employment status

| **Covariates** | **OR** | **95% CI** | **P value** |
| --- | --- | --- | --- |
| Age (per 1-year increase) | 0.964 | 0.923–1.010 | 0.101 |
| Sex, male | 1.270 | 0.511–3.180 | 0.604 |
| Preoperative BMI | 1.070 | 0.964–1.190 | 0.205 |
| Preoperative CRP | 0.557 | 0.270–1.150 | 0.112 |
| Procedure, esophagectomy | 0.602 | 0.293–1.240 | 0.167 |
| Clavien–Dindo, ≥ III | 0.436 | 0.154–1.230 | 0.118 |
| Employment status, full time worker | 0.703 | 0.342–1.440 | 0.338 |

Odds ratios for continuous variables represent the effect per one-unit increase.
